# Supplementary material for: Single-cell RNA-seq reveals distinct metabolic “microniches” and close host-symbiont interactions in deep-sea chemosynthetic tubeworm
Source: PubMed Central journal article supplement — Sci Adv. 2024 Jul 24;10(30):eadn3053. doi: 10.1126/sciadv.adn3053 (PMC11268408; doi:10.1126/sciadv.adn3053), 2024-07-24
Supplement: sciadv.adn3053_sm.pdf [file sciadv.adn3053_sm.pdf]

Supplementary Materials for  
**Single-cell RNA-seq reveals distinct metabolic “microniches” and  
close host-symbiont interactions in deep-sea chemosynthetic tubeworm**

Hao Wang *et al.*

Corresponding author: Angela Ruohao Wu, [angelawu@ust.hk](mailto:angelawu@ust.hk); Chaolun Li, [lcl@qdio.ac.cn](mailto:lcl@qdio.ac.cn);  
Pei-Yuan Qian, [boqianpy@ust.hk](mailto:boqianpy@ust.hk)

*Sci. Adv.* **10**, eadn3053 (2024)  
DOI: 10.1126/sciadv.adn3053

**The PDF file includes:**

Figs. S1 to S20  
Legends for tables S1 to S6

**Other Supplementary Material for this manuscript includes the following:**

Tables S1 to S6

**Fig. S1.**

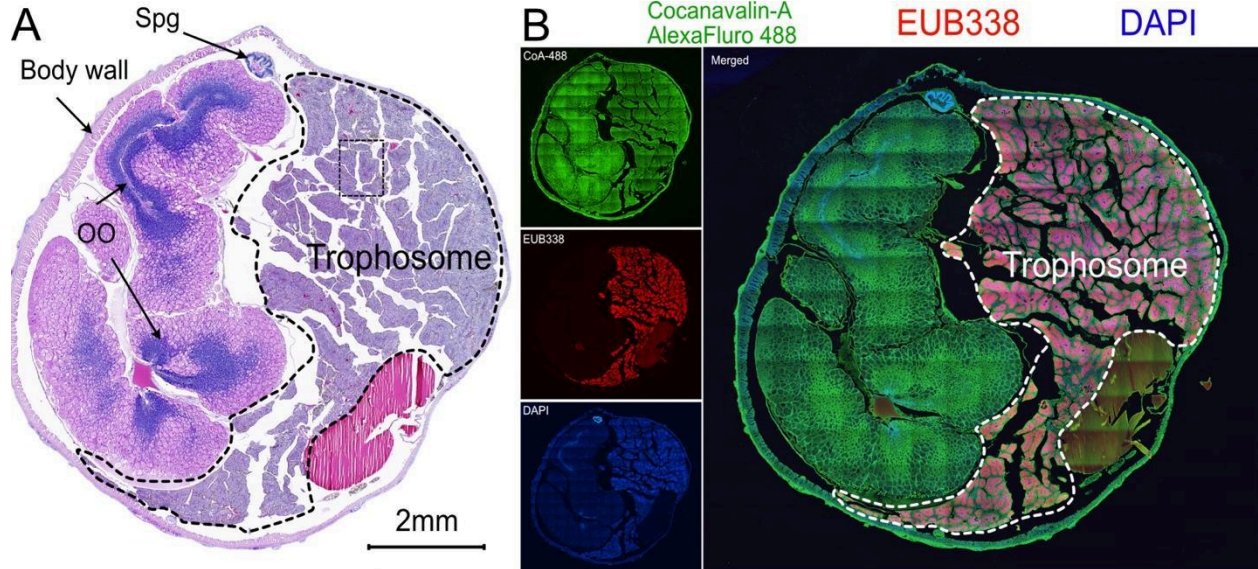

**Supplementary Figure S1: The trophosome of a *Paraescarpia echinospica* tubeworm.** The trophosome was circled in a long dashed line. (A) Hematoxylin and Eosin (H&E) staining of a cross-section of an adult *P. echinospica* tubeworm, the trophosome was circled in a long dashed line. The fine dash-lined square is shown in Figure 1D. (B) Fluorescent *in situ* hybridization (FISH) analysis of a cross-section of an adult *P. echinospica* tubeworm. The intracellular endosymbionts could be detected in the trophosome of the tubeworm. The trophosome was circled in a long dashed line. OO, oocyte; Spg: Spermatogonia.

Fig. S2.

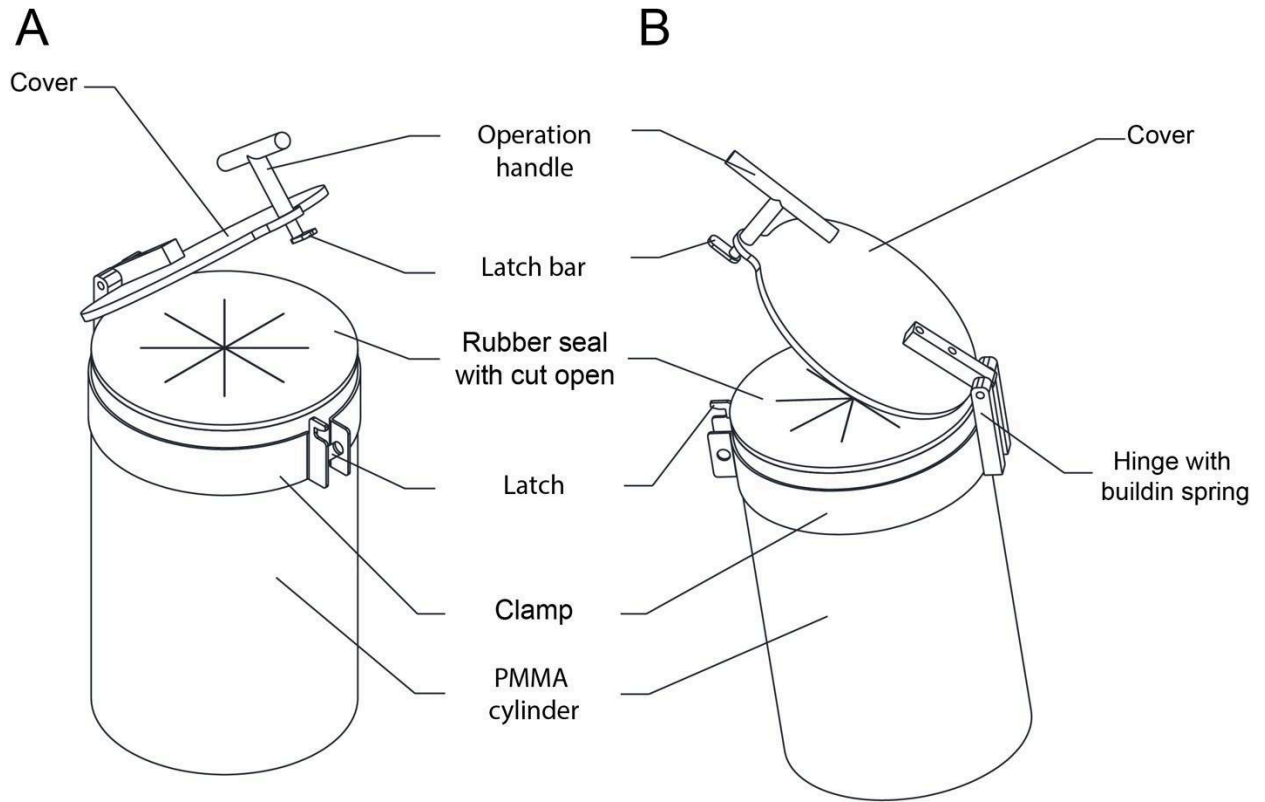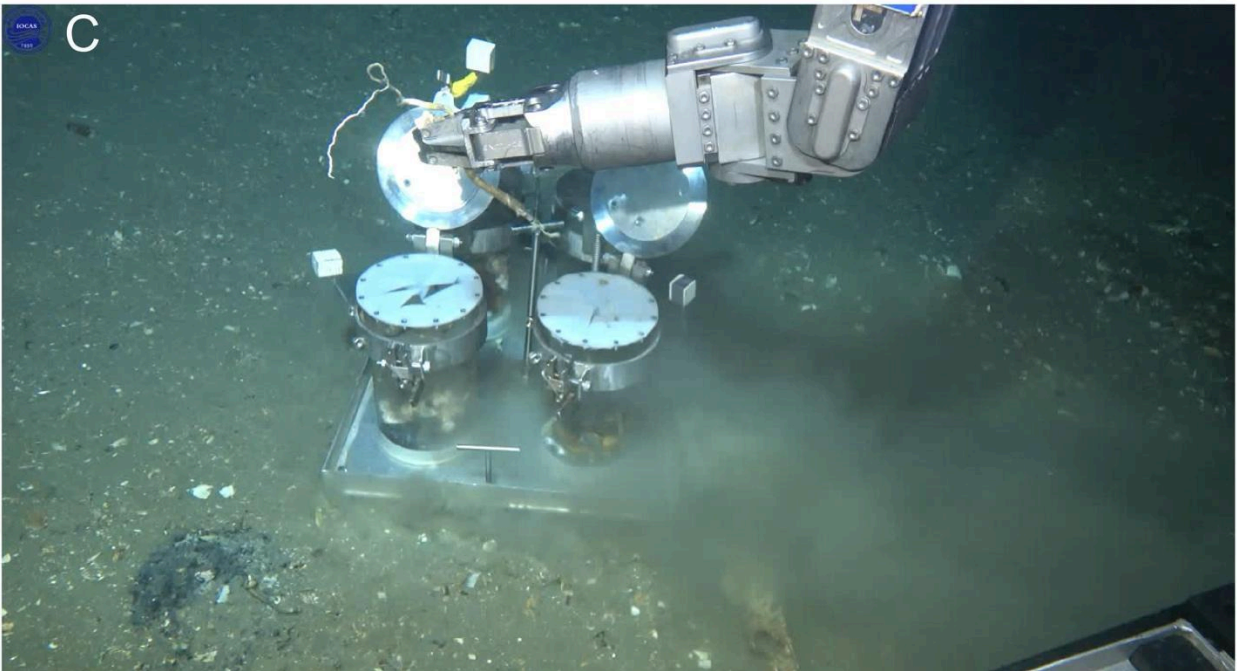

**Supplementary Figure S2: The deep-sea *in situ* animal fix apparatus.** (A) and (B) front and back view of the deep-sea *in situ* animal fix apparatus. (C) Photographic image of ROV “Faxian” collecting a *Paraescarpia echinospica* tubeworm during 2020 cruise at “F-site” cold-seep.

**Fig. S3.**

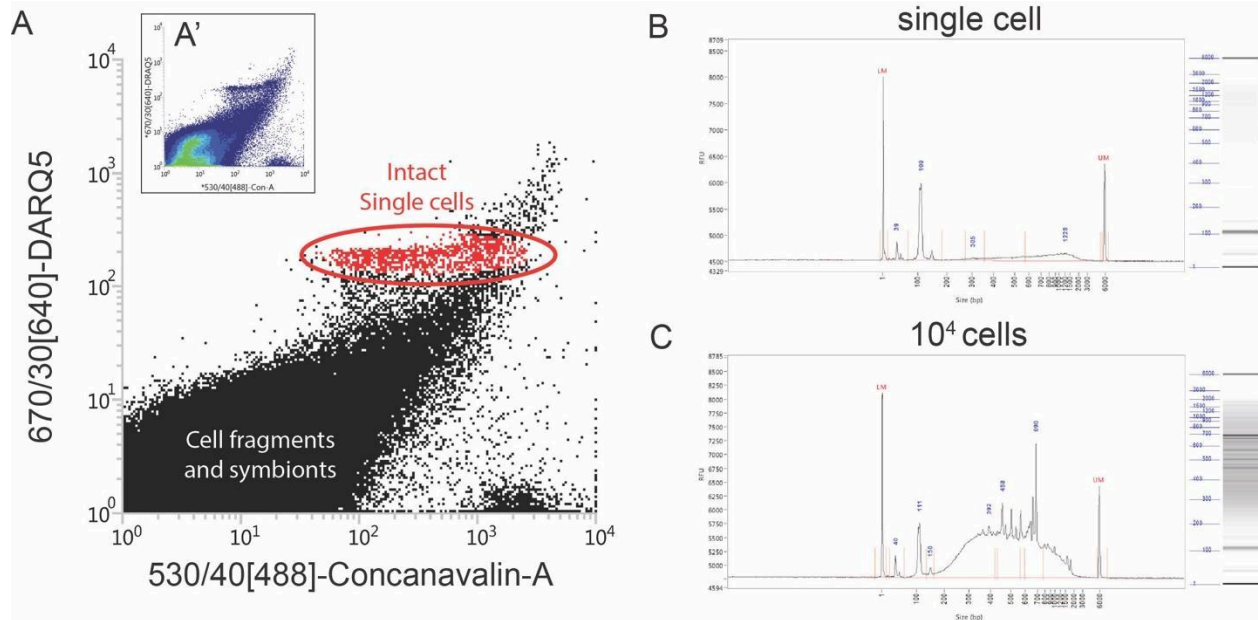

**Supplementary Figure S3: Fluorescent active cell sorting (FACS) and cDNA quality check of the *in situ* fixed *Paraescarpia echinospica* trophosome cells.** (A) Flow cytometry profiles of *Paraescarpia echinospica* trophosome cells ACME-dissociated cells stained with DRAQ5 (nucleus) and Concanavalin-A 488 (cytoplasm). The gated singlets are labelled in red. (B) and (C) examining the cDNA quality of single-gated cells and  $10^4$  gated cells.

**Fig. S4.**

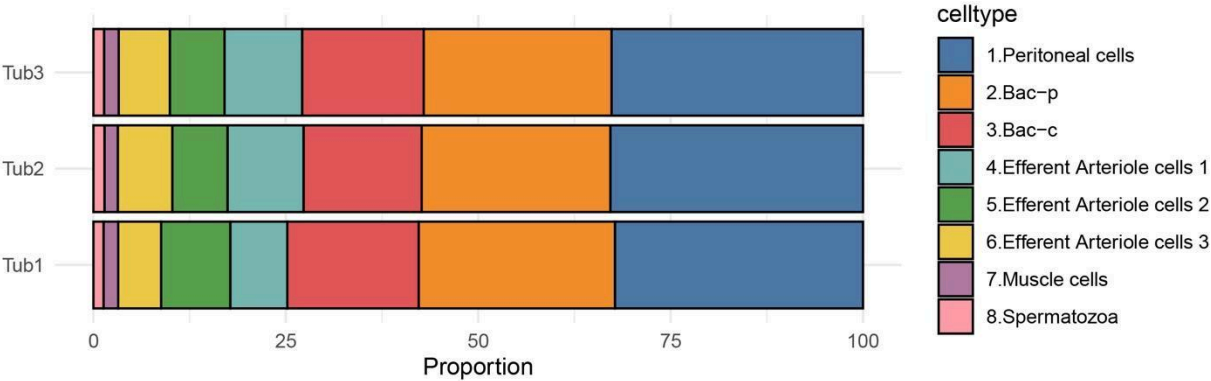

**Supplementary Figure S4: Proportion of different cell types in three scRNA-seq runs.**

**Fig. S5.**

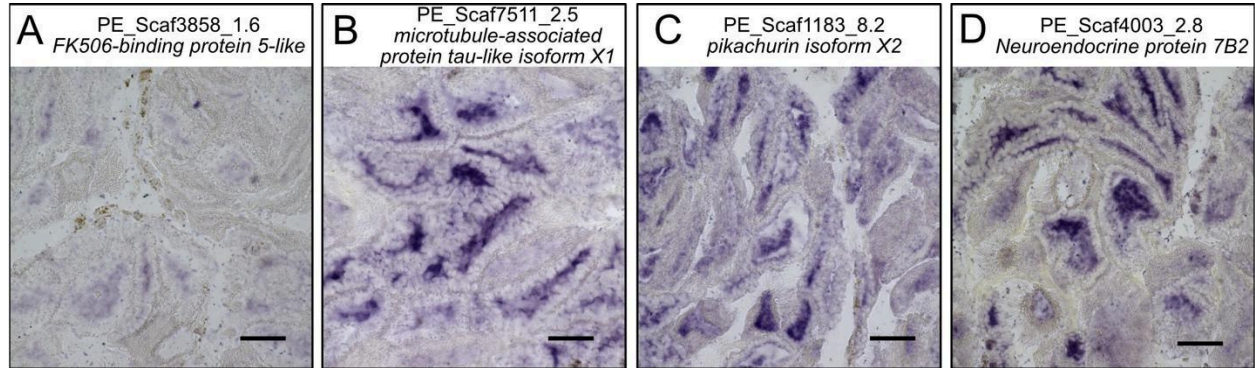

**Supplementary Figure S5: *in situ* hybridization analyses of the gene markers of the spermatozoa cell cluster.** (A) gene encoding FK506-binding protein 5-like (PE\_Scaf3858\_1.6), (B) gene encoding microtubule-associated protein tau-like isoform X1 (PE\_Scaf7511\_2.5), (C) gene encoding pikachurin isoform X2 (PE\_Scaf1183\_8.2), and (D) gene encoding Neuroendocrine protein 7B2 (PE\_Scaf4003\_2.8). Scale bar = 50  $\mu$ m

**Fig. S6.**

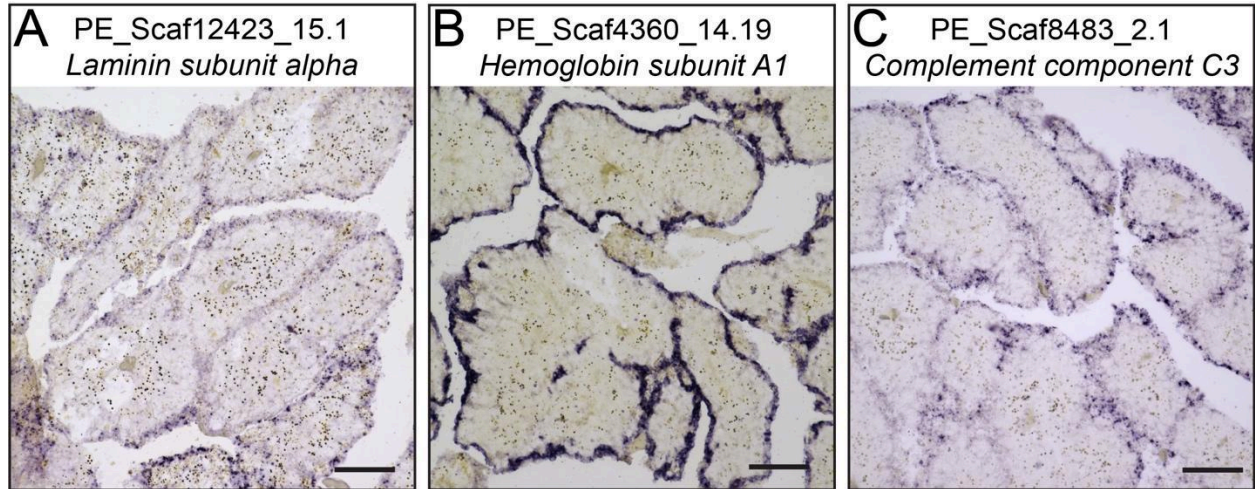

**Supplementary Figure S6: *in situ* hybridizations of additional peritoneal cell markers.** (A) gene encoding Laminin subunit alpha (PE\_Scaf12423\_15.1), (B) gene encoding Hemoglobin subunit A1 (PE\_Scaf4360\_14.19), and (C) gene encoding Complement component C3 (PE\_Scaf8483\_2.1). Scale bar = 100  $\mu$ m



Fig. S7.

>PE\_Scaf4360\_14.19 hemoglobin subunit A1

**MKVPCILLVLLGAVVVATA**EKCNDLERIKVKMQWAKAYSFGANRAKFGDALWANVFNYAPDARSIFESVKSENMKSPFEQAHIA  
VLGGLDRVISMLDSKPTLDADLAHLKSQHDPRGLDPATFVFRQALIAVAGTFGVCFDVPWAQRFCFNVIKAGITGSDTFA

>PE\_Scaf4360\_15.1 hemoglobin subunit A1

**MKTLIILLGFVACAFAT**DCGMLQRIKVKQWATVYSSGIAREDFGEAIWKAVFAQAPQARALFKRVGVDDIHSPAFKAHIA  
LDMAISLLDNEPTLKAELAHLNGQHKERGIPSNYDVFIRALHAVPAALGRCFDHPAWDACSDVVIAGIRQ

>PE\_Scaf4360\_14.5 hemoglobin subunit A2

**MKSLIAFVCLVAAVNYCCA**DHVCGLPLQRLKVKRQWAEAYGSGNRREDFGHYIWSHVQFQSPAARDMFKRVVGRDNIHTSAFRAH  
ATRVLGGLDMCVALLDVEPVLDSQLAHLSSQQAHTRGVEAAHYETFEHAV/MMGIENVIGAEVFDQDAWKPCPKVITGGIQG

>PE\_Scaf7478\_3.3 hemoglobin subunit B1

**MNSLILALMLCGATVALVKA**EASDHCSYEDAEIVMKEWQHILGNGQSAPILLVAANVFFTGKFEKVPVTSALFKRVNVADMHSGE  
FQAHTMRVMTGLDELINKLHSPAVLDSMLAHLAEQHAVRDGVTHELFHVFRDVMYDSLGLQLLDEYNPDWRNCMFHILYGIAGA  
LP

>PE\_Scaf8283\_1.7 hemoglobin subunit B1

**MNSLILALVLVCGATVALA**EGETSSHCSFEEDIVMKEWQHILSHGDSATILMRAANVVFSGMFEKEPSSAALFNRVNVADMHSGE  
FHAHTMRVMTGLDELINKLHSPAVLDSMLAHLAEQHALRDGVTHELFHVFRDILYSSLGQLLDEYNPDWAKSCMFHILYGIAGALP

>PE\_Scaf8283\_3.3 hemoglobin subunit B1

**MNSLILALVLVCGATVALA**SEYCSYEDADIVMNEWQHILGSGNSAPILMRAANVIFSAMFEKDPSSRDLFNRVNVADMHSGEFH  
TLRVMNGLSELINKLHSPAVLDSMLAHLAEQHAVRDGVTHEQFHVFRDILYSSLGQLLDEYNPDWAKSCMFHILYGIAGSLP

>PE\_Scaf350\_4.9 hemoglobin subunit B1

**MHRLAPFLLVVCGATATLGR**RTFCSDDDADIAIAQWTQGFQGGNINPKAVITGSTGFFVRRMMQMDPSIKPLLKSVNVDDVNSAE  
FGAHLRVMIGLDLCVNALNDIPLLEEITSHLAKQAARIGVKREHLFLLFESTLKAFFKLIDNFNGDAWYNCLEPVFKALTVDLF

>PE\_Scaf7230\_5.8 hemoglobin subunit B1

**MNPLSTFLLVVCASSAVLG**EYCSEADATIVIDQWTSIYNAGVSSASRATLGNQIFSTLFLKAPDSESLFARVGVDDMSSGA  
SRVLSGLDMGINSLKQTATLNSLTHELAAQHIARPGVKAVYFRVMGKVLMTALPTLIEDFNPDAWRNCLLPLKQAIKGLPVMRLL  
GCLSLFLSCAMAWTGYNFCVKCDAEVVKAQWNVFYAAPNSGTSKYMLASHIFDRLFASSPDAKDLFKRVNVHDQSSPEFQAHV  
RVINGLDLCLNSLGNRPLLESVTDHMATQHFVREGVTQTHFDPSTTSTTRGRAASPG

>PE\_Scaf1853\_2.14 hemoglobin subunit B1

**MKTVFLLVALSCVTMCLA**NEHNKVCVTHDADAVTEMWESVWSAQNSEQVRVELAEEIFEYIFQKNPAAKELFTRVNVADVNSPE  
FQAHVVRVINGLDILINFLDDLPSLEAAAGHLADQHAVRAGVTKAAFQLMDDAFVELLPQIVDNFNPDTWQRCWHSADIIITVLP

>PE\_Scaf1853\_3.4 hemoglobin subunit B1

**MKTVFLLLALSCMTSCMA**HSSQCETHDDAAQVIKMWESVWGAQNSDKIRIVLAEFAHIFQRDPGAKQLFSRVNVADIHSPEFE  
AHVVRVINGLDILINFLDDRPSLEAAAKHLADQHAVRAGVSVGYFQVMDDAFVEILPQVVDHFDPTWQNCWHSADIIITSKLP

>PE\_Scaf10099\_2.6 L1 linker protein of V1 giant hemoglobin

**MKGLTAVVVLAVLLGVSLG**CVGSGMGYGFASSKLOIQRRVDRLKNSIAGLRAKVEQAQNSGDKVALDHLNTRLLLLDAPNCF  
ENSVRCGHSEQCMSELEFCDGVQDCNNNFDEEACFSAPPSGSFWAGDLYHAGCGFIENSLRFLFITGHDHKYFYGAVHVGISAS  
MVIRHPSNGGITTHNYNLEGCYSFGKRELDLDAPGNAFELRCNIRSEEWLSCDLVQMTGGNKCGHAHLVKQPYSGCMTGTIA  
CIFITLRPPEGFKNAILVVTESAVWRHCDREEDHCNTFNLFDAV/VSKIRNTNTRYSRPGLLSAGQAPRG

>PE\_Scaf7855\_5.11 L4 linker protein of V1 giant hemoglobin

**MRRLALLAVVAAVRG**FSTHLNADHVHDQDYPNDVPSKGVKPADRETAISSIELEVSADANDLRMNELOGELDDLAAEVEDMPS  
EPANTKSQLYYMRLKNGCGDRQFQCLQASDEVPCQIPNIAVCDGVQDCCKNGNDETSSICKNHTPVGSSWGGDLEWVGAA  
HRSKRVYVVITRAWQDDYLPMSQKVAATLVFSWVEDGKTMNTTEQMEGHYCYGGHALKLRASNGHVAADIVCNFIDPNHCHGKI  
FKASTGTVCSRILTRQ

>PE\_Scaf6206\_2.11 L4 linker protein of V1 giant hemoglobin

**MQSLMVLVLLAVAAVVG**FSSHLDADHVHDQDYPYGMGLKAPFAWTSPTGTAISSIELEVSADANDLRMDDLQAQLDELQTEADKIS  
EAPTVPWPVSYFLRFNGNSCDKGRFQCSISSDEVKQCVSNLAVCDGITDCKNGNDEKLCRNHMPLGSSWAGDLDWVGCEAH  
RSKRLYVVVTRVWKDFMPSVQKIAVNLIFTWVEVGRMTNMVQAEGRYHATHSFELNADPNSHLSADITCSFTDDNHCHGVIF  
QATTGTLCGRIILIRSSPERITLSVSRQHE

Supplementary Figure S7: Signal peptides of extracellular hemoglobin components.

**Fig. S8.**

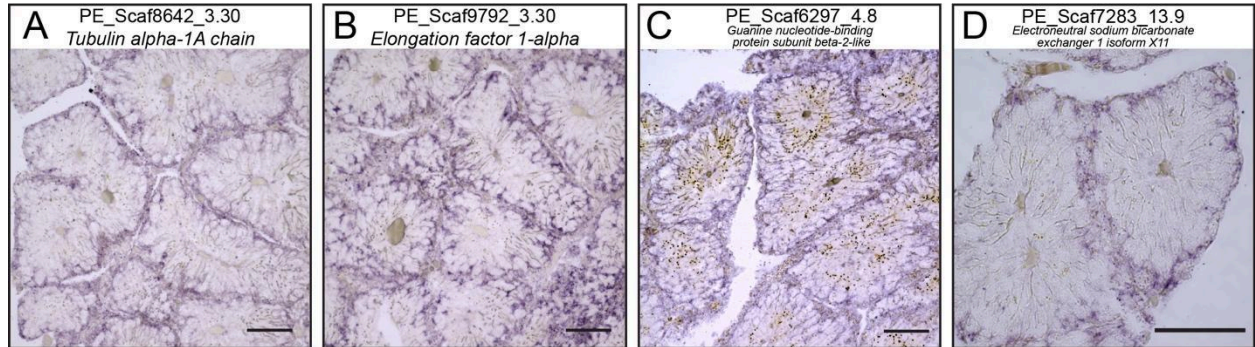

**Supplementary Figure S8: *in situ* hybridization analyses of additional EA cell gene**

**markers.** (A) gene encoding Tubulin alpha-1A chain (PE\_Scaf8642\_3.30), (B) gene encoding Elongation factor 1-alpha (PE\_Scaf9792\_3.30), (C) gene encoding Guanine nucleotide-binding protein subunit beta-2-like (PE\_Scaf6297\_4.8), and (D) gene encoding Electroneutral sodium bicarbonate exchanger 1 (PE\_Scaf7283\_13.9). Scale bar = 100  $\mu$ m.

Fig. S9.

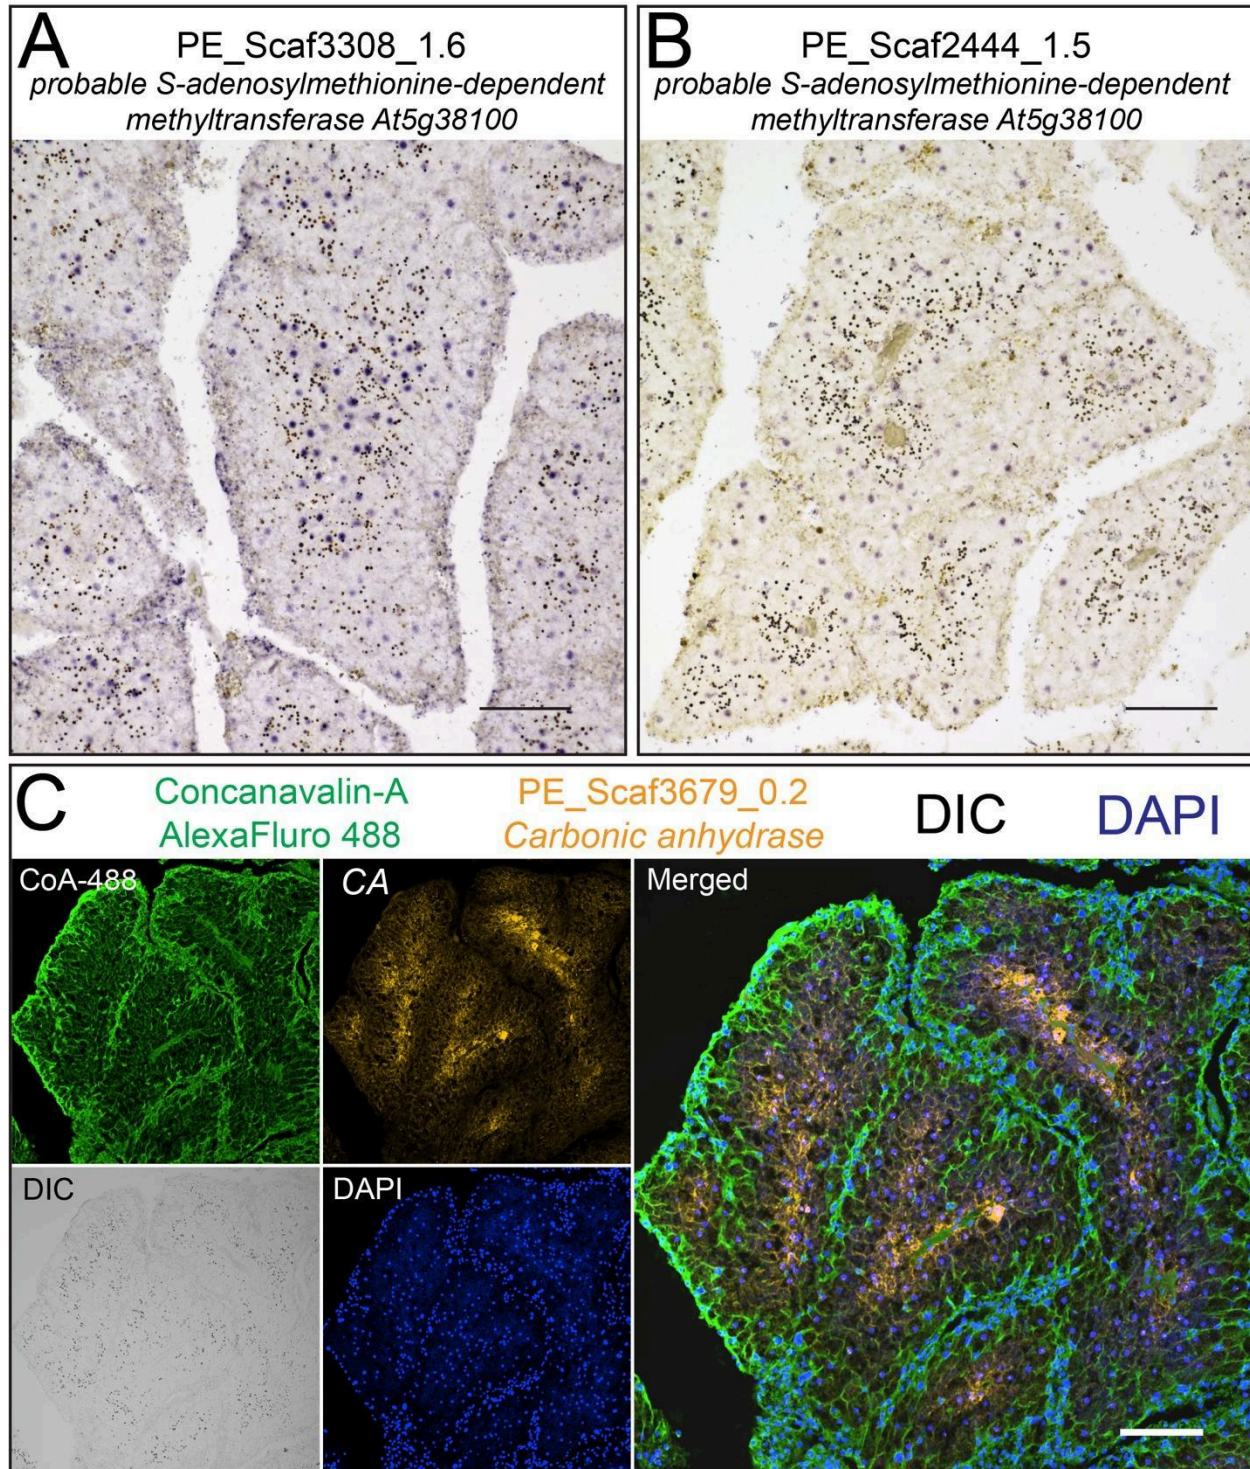

Supplementary Figure S9: *in situ* hybridization and FISH analyses of additional Bacteriocytes markers. (A) and (B): genes encoding probable SAM-dependent

methyltransferase (PE\_Scaf3308\_1.6 and PE\_Scaf2444\_1.5), showing both genes are expressed in the center bacteriocytes. (C) FISH analysis of gene encoding Carbonic anhydrase (PE\_Scaf3679\_0.2). Scale bar = 100  $\mu$ m

Fig. S10.

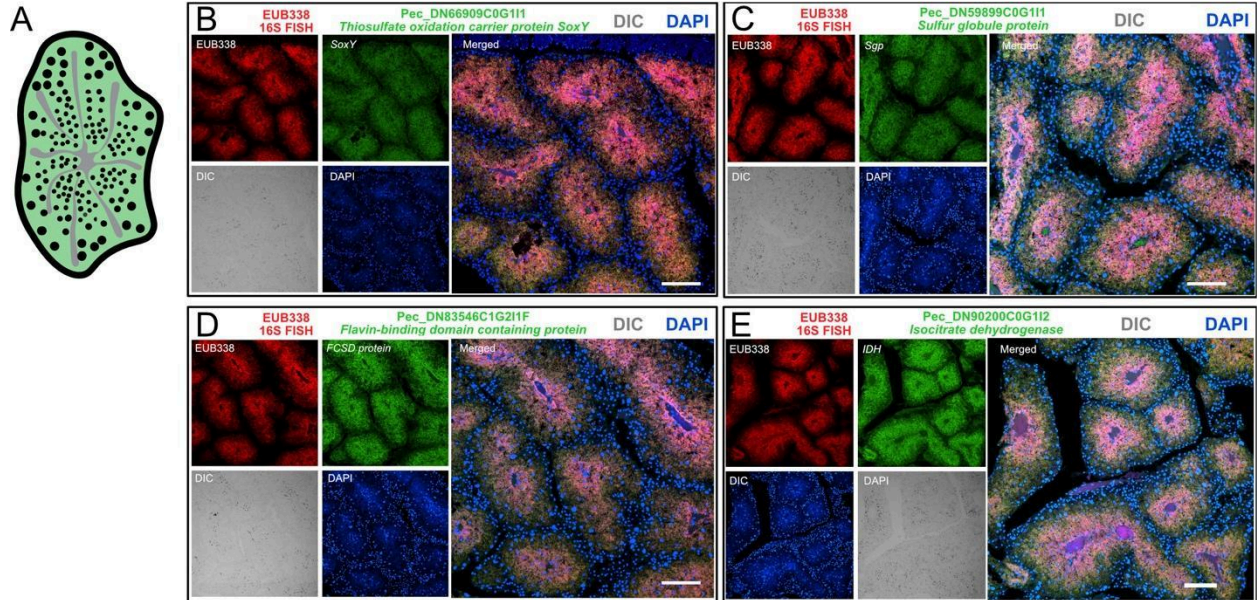

**Supplementary Figure S10: Analysis of expression of key symbiont metabolic genes.** (A) diagram showing the expression patterns of these genes, with no difference between the periphery and center region. (B)-(E) examined key metabolic genes that showed no difference between periphery and center symbionts. Scale bar = 100 μm

Fig. S11.

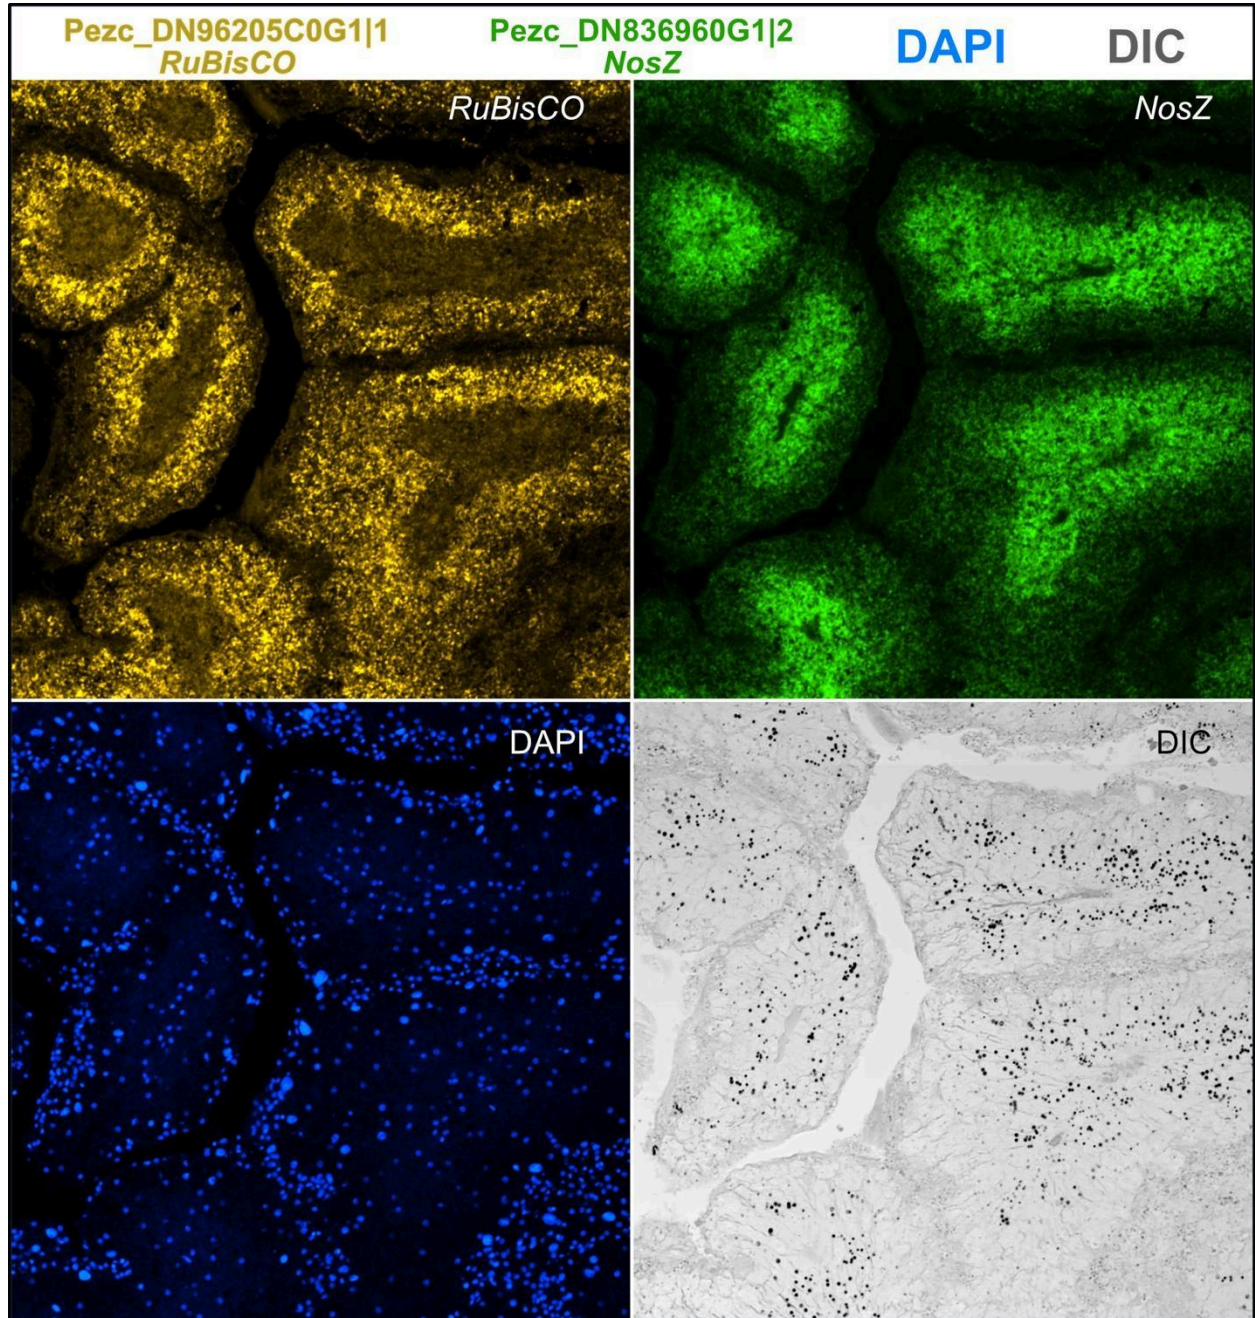

**Supplementary Figure S11: Double fluorescent *in situ* hybridization analysis of symbiont *RuBisCO* and *NosZ*.** Double fluorescent *in situ* hybridization analysis of genes encoding symbiont *RuBisCO* (Pezc\_DN96205C0G1|1) and symbiont *NosZ* (Pec\_DN83696C0G1|2). The merged image is shown in Figure 6B.

Fig. S12.

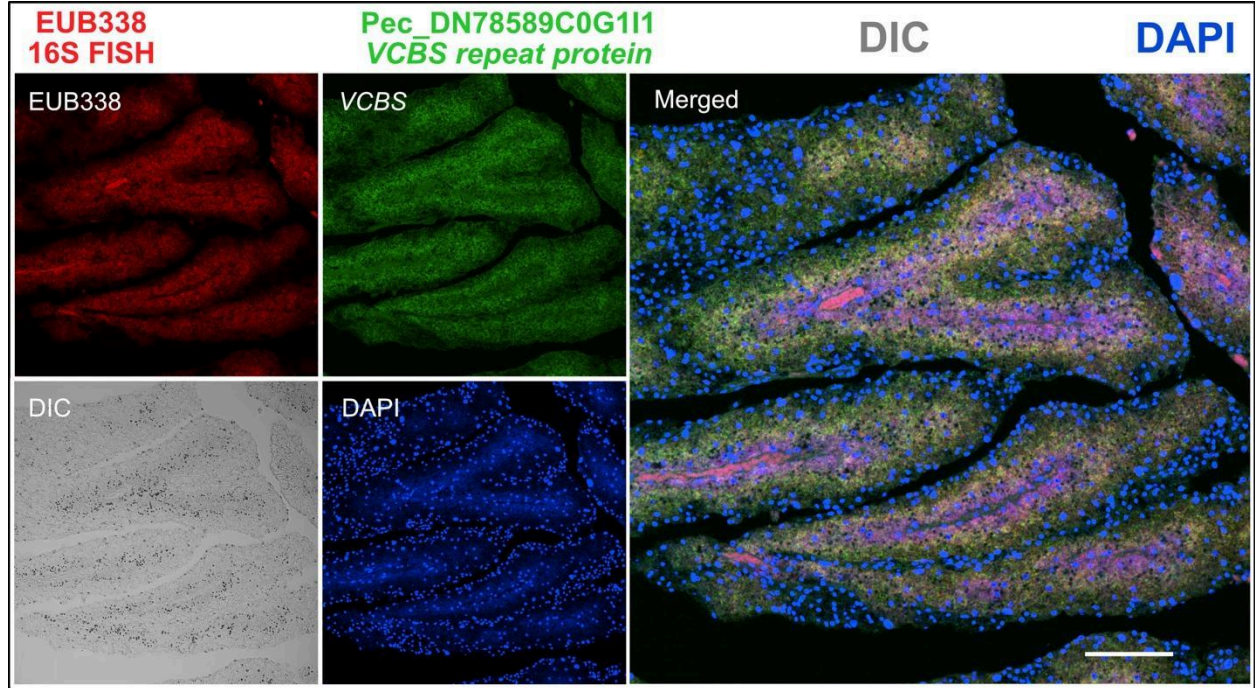

**Supplementary Figure S12: Double fluorescent *in situ* hybridization of symbiont *VCBS repeat protein* and symbiont 16S rRNA.** Double fluorescent *in situ* hybridization of symbiont gene encoding VCBS repeat protein (Pec\_DN78589C0G111) and symbiont 16S rRNA, showing the gene encoding VCBS repeat protein is expressed in the symbionts located in the periphery of trophosome lobules. Scale bar = 100  $\mu\text{m}$

Fig. S13.

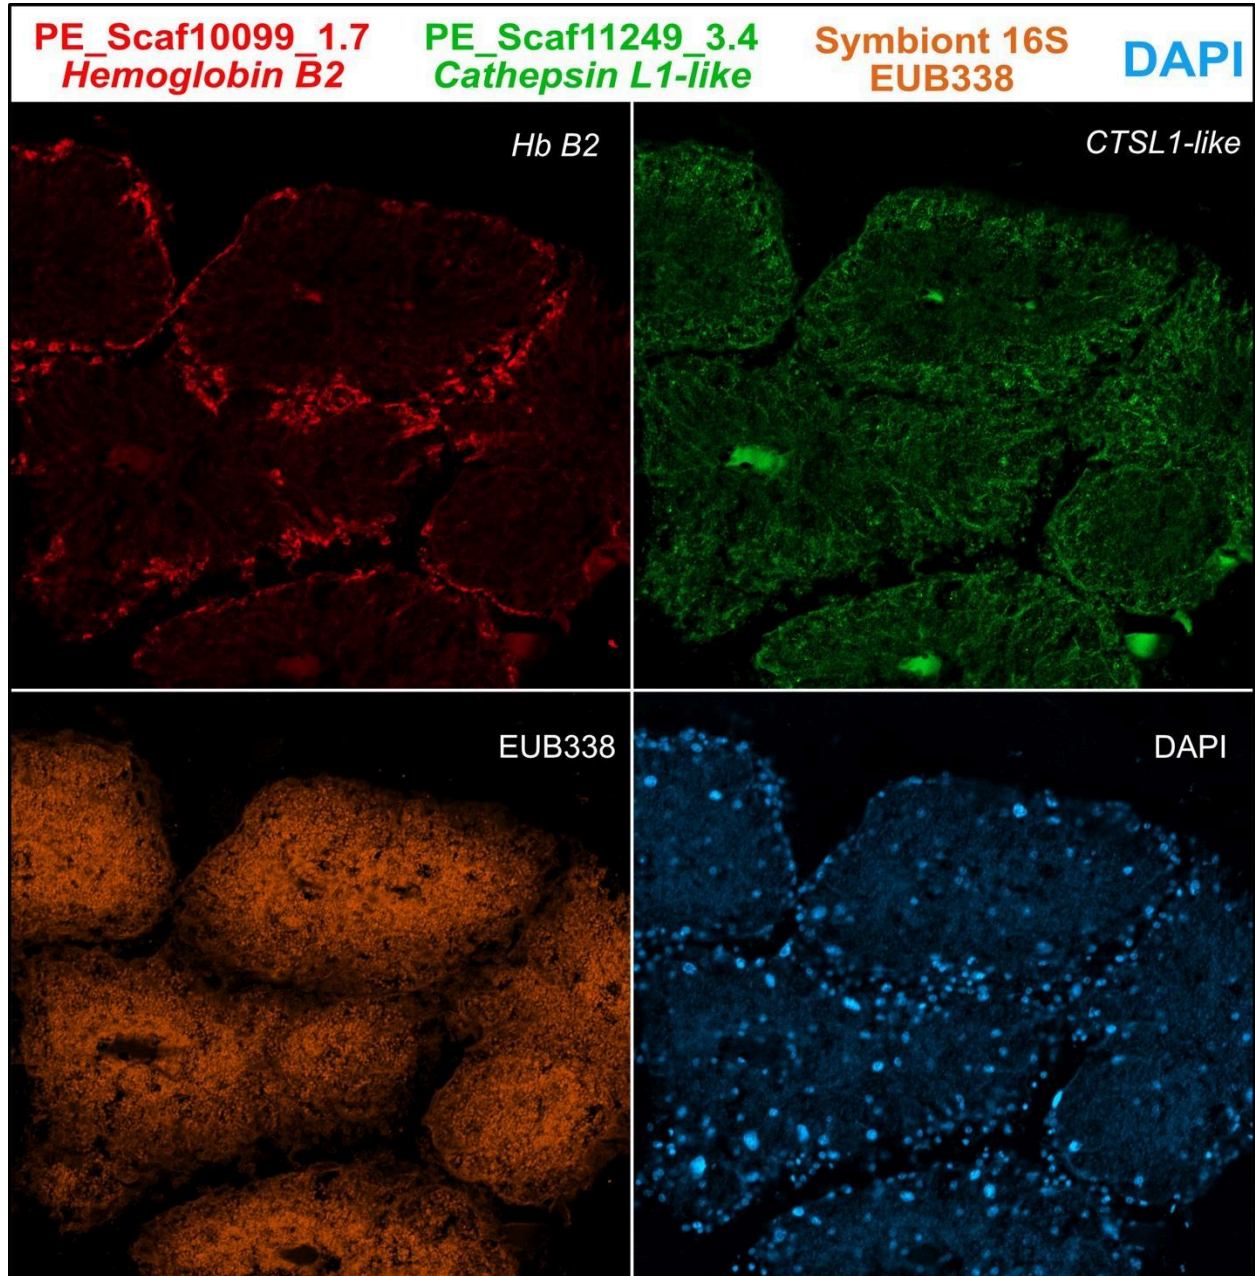

**Supplementary Figure S13: Multicolor fluorescent *in situ* hybridization analysis of host *Hemoglobin B2*, host *Cathepsin L1-like*, and symbiont 16S rRNA.** Multicolor fluorescent *in situ* hybridization analysis the genes encoding tubeworm host *Cathepsin L1-like* (PE\_Scaf11249\_3.4), host *Hemoglobin B2* (PE\_Scaf10099\_1.7), and symbiont 16S rRNA. The merged image is shown in Figure 6D.





Fig. S14.

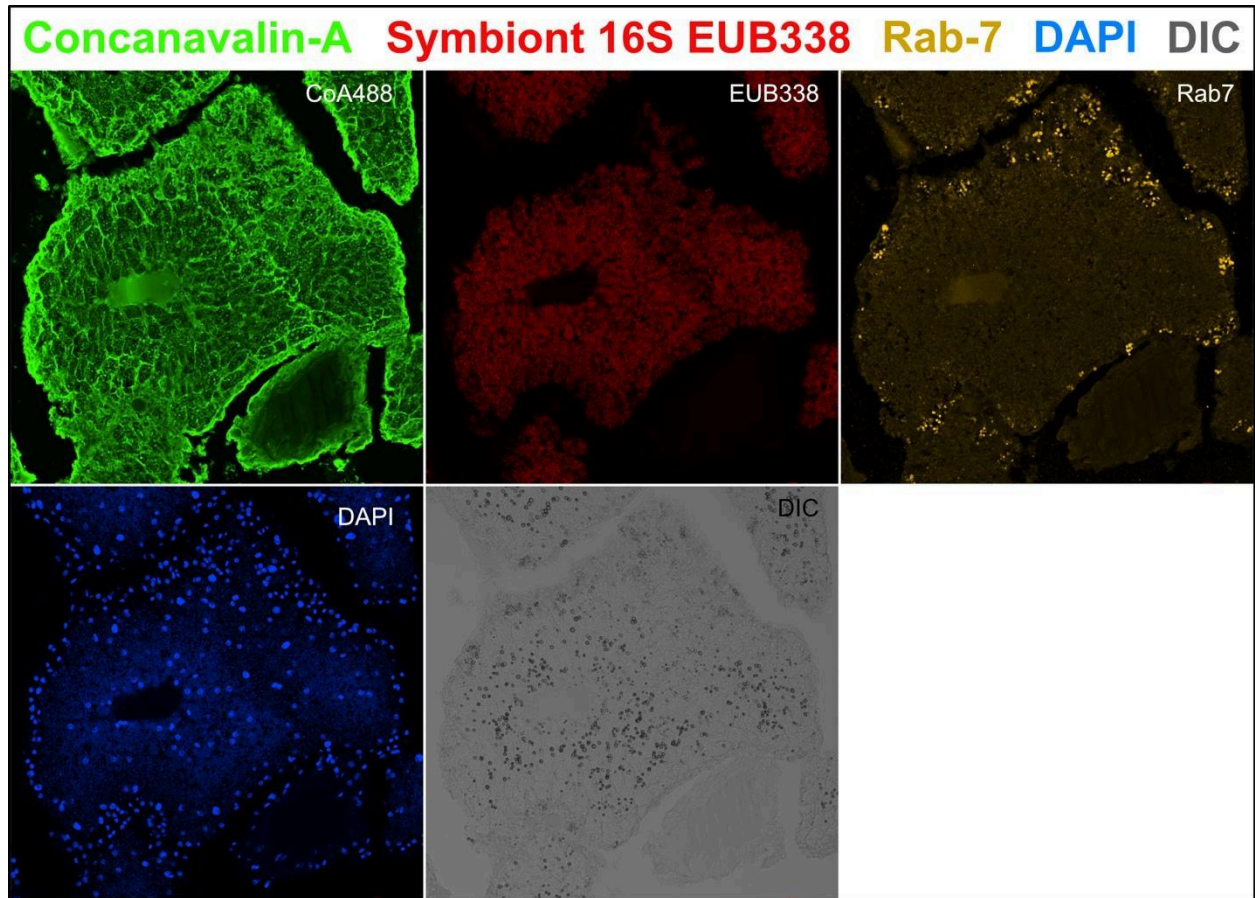

Supplementary Figure S14: FISH-IHC analysis of the symbiont 16S rRNA and late endosome marker Rab-7. The merged image is shown in Figure 6E.

Fig. S15.

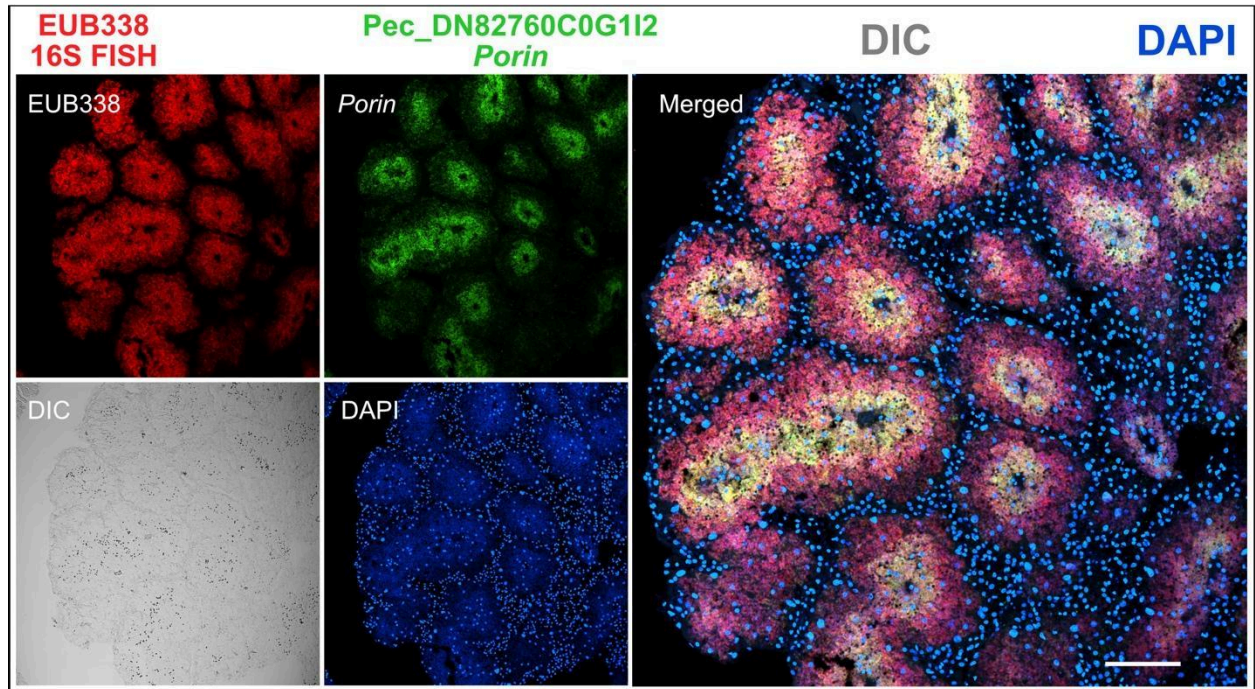

**Supplementary Figure S15: Double fluorescent *in situ* hybridization analysis of symbiont *Porin* and 16S rRNA.** Double fluorescent *in situ* hybridization analysis of symbiont gene encoding porin (Pec\_DN82760C0G1I2), showing gene encoding porin is highly expressed in the symbionts located in the lobule center. Scale bar = 100  $\mu$ m.

Fig. S16.

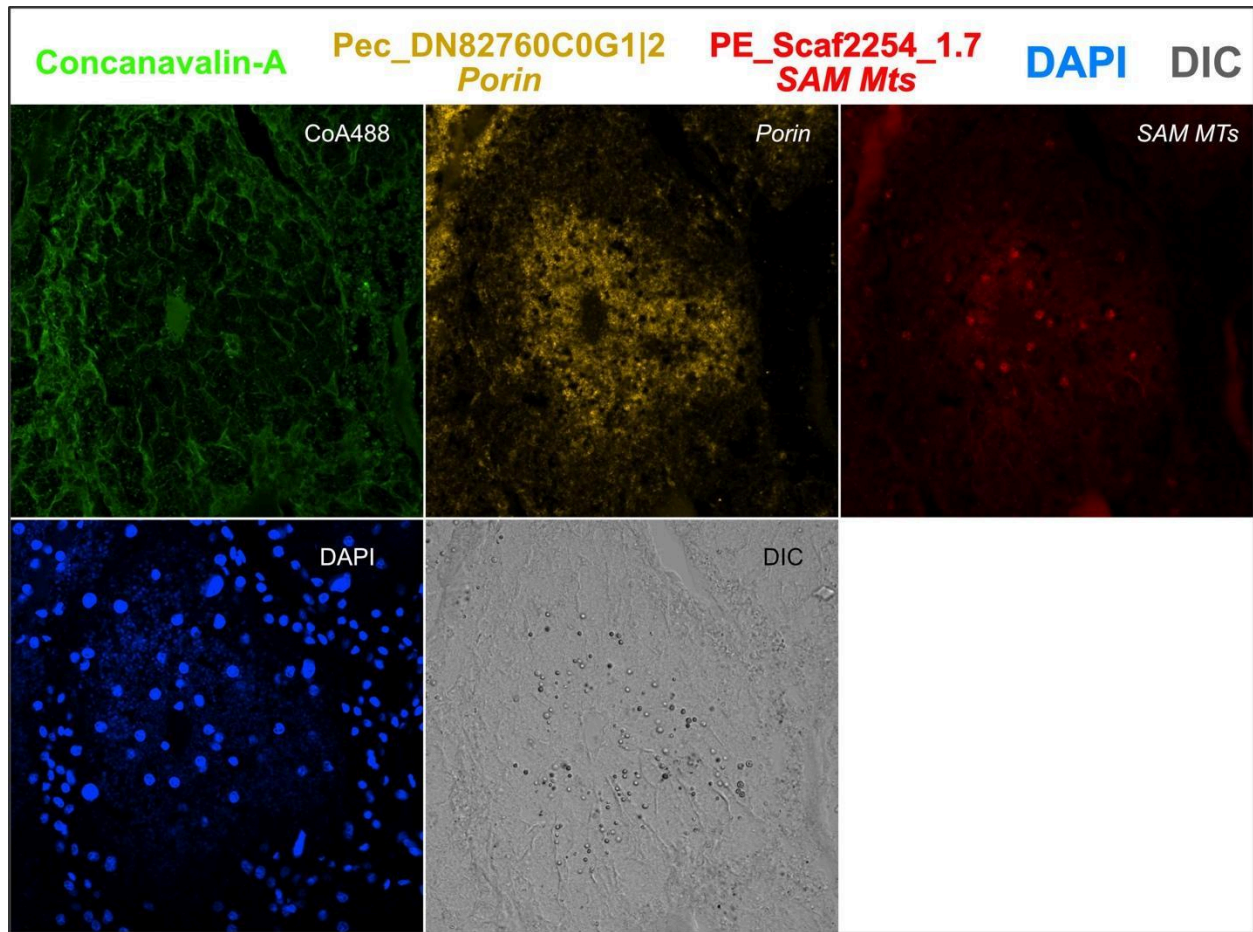

**Supplementary Figure S16: Double *in situ* hybridization analysis of symbiont *Porin* and**

**host *SAM Mts*.** Double *in situ* hybridization of genes encoding symbiont Porin

(Pec\_DN82760C0G1I2) and host SAM-dependent methyl transferase (PE\_Scaf2254\_1.7). The

merged image is shown in Figure 6I.

Fig. S17.

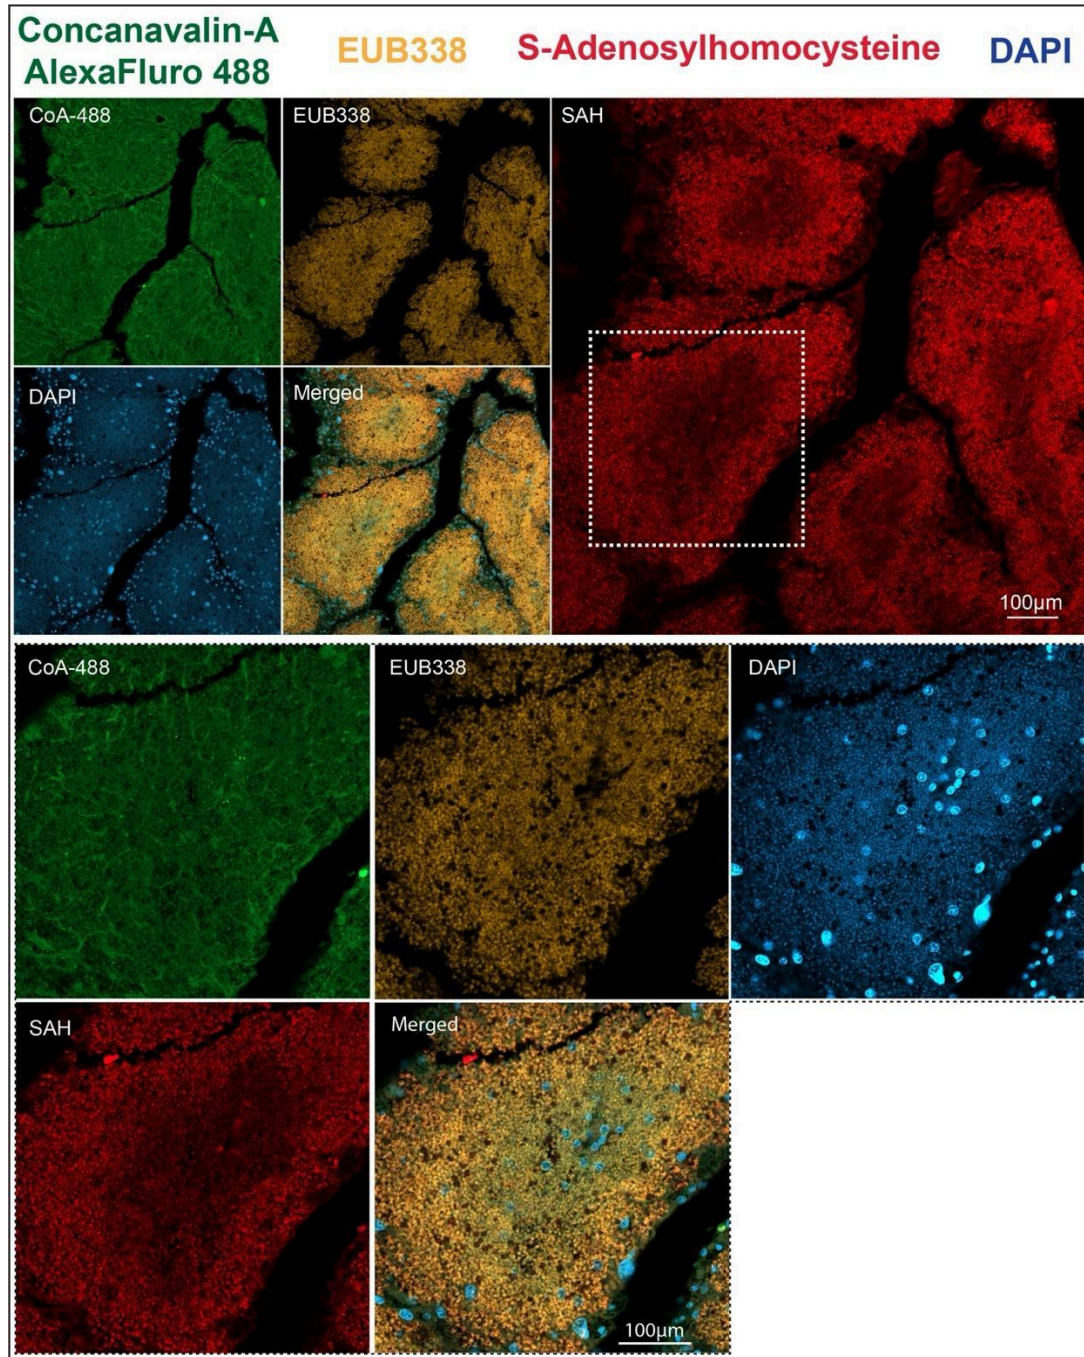

**Supplementary Figure S17: IHC-FISH analysis of S-adenosylhomocysteine (SAH) distribution in trophosome lobules.** The SAH staining in dash lined area is shown in Figure 6J.

Scale bar = 100 µm.

**Fig. S18.**

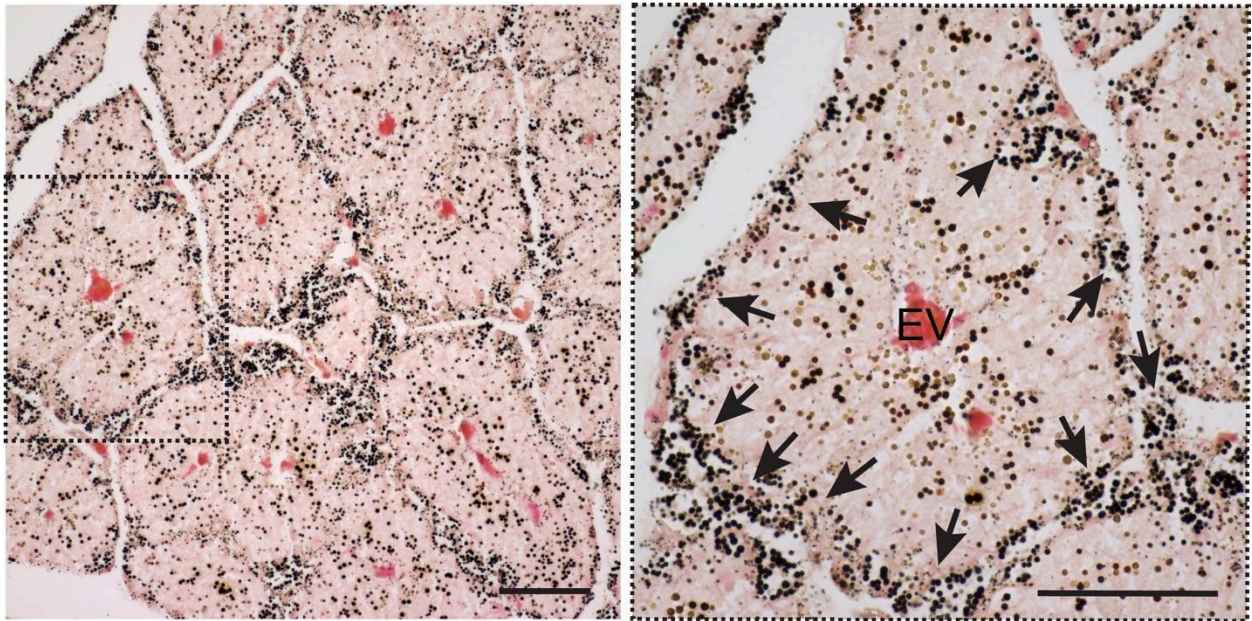

**Supplementary Figure S18: Gomori methenamine silver staining analysis.** Gomori methenamine silver staining analysis of the trophosome urate/uric acid deposits, showing the black urate/uric acid deposit around the periphery of each trophosome lobule (indicated by black arrows). Scale bar = 100  $\mu$ m

**Fig. S19.**

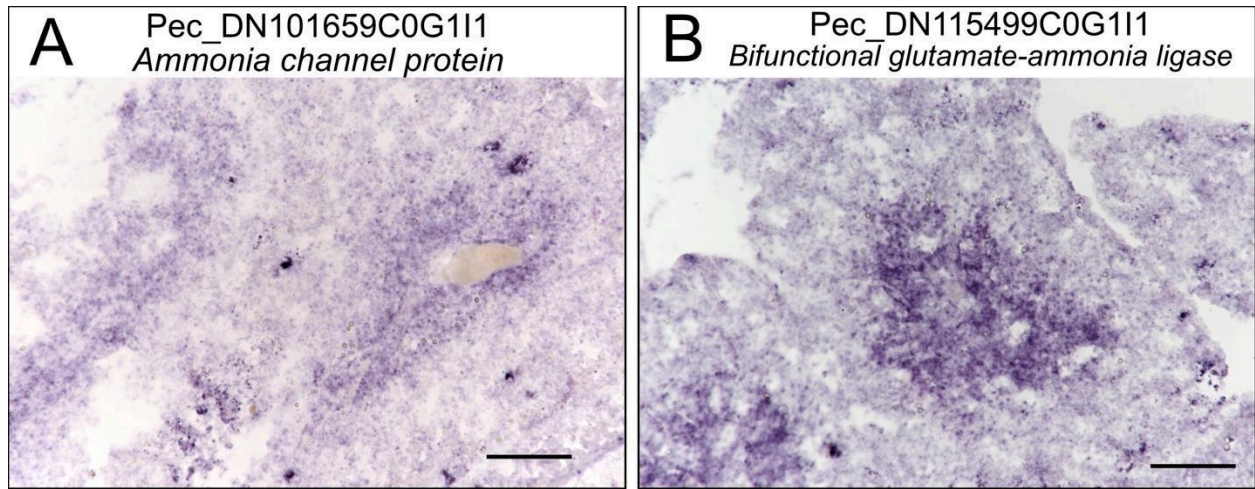

**Supplementary Figure S19: *in situ* hybridization analyses of symbiont ammonia-related**

**genes.** *in situ* hybridization analyses of genes encoding (A) symbiont Ammonia channel protein (Pec\_DN101659C0G1I1) and (B) Bifunctional glutamate-ammonia ligase

(Pec\_DN115499C0G1I1), showing both genes are expressed in the symbiont in lobule center.

Scale bar = 50  $\mu$ m

**Fig. S20.**

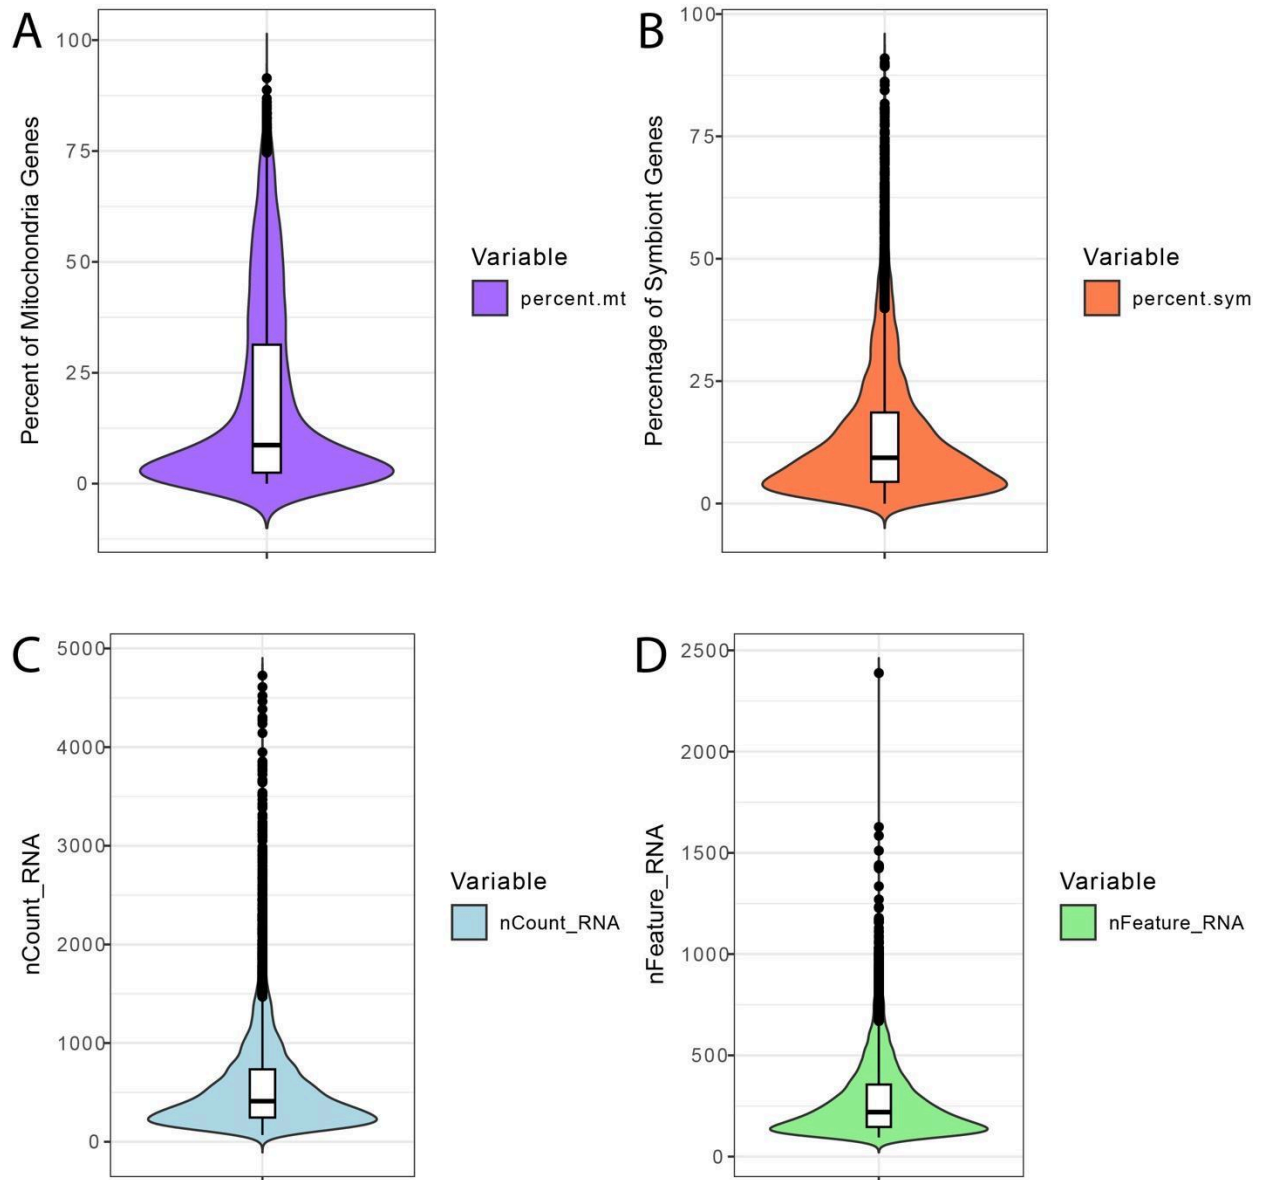

**Supplementary Figure S20: Violin plots showing scRNA-seq data quality metrics. (A)** Percentage of mitochondria genes; (B) symbiont gene counts; (C) nCount\_RNA (number of UMI); and (D) nFeature\_RNA (number of genes) across all cells were analyzed by Seurat.



## **Captains of Supplementary Tables:**

**Supplementary Table S1: Identified cell markers of the muscle cell, Spermatozoa cell, and an Ambiguous cell cluster.**

**Supplementary Table S2: Identified cell markers of the Peritoneal cells.**

**Supplementary Table S3: Identified cell markers of the three efferent arteriole cell clusters.**

**Supplementary Table S4: Identified cell markers of the two bacteriocyte clusters.**

**Supplementary Table S5: Primers used to generate in situ hybridisation probes.**

**Supplementary Table S6: HCR Primers.**
